# Supplementary material for: Light-driven locomotion of a centimeter-sized object at the air–water interface: effect of fluid resistance
Source: Royal Society of Chemistry journal article supplement (doi:10.1039/c9ra01417a), 2019-01-01
Supplement: c9ra01417a1.pdf [file c9ra01417a1.pdf]

## Electronic Supplementary Infomaton

Light-driven locomotion of centimeter-sized object on air-water interface:

Effect of fluid resistance

Hisato Kawashima<sup>a</sup>, Akihisa Shioi<sup>b\*</sup>, Richard J. Archer<sup>c</sup>, Stephen J. Ebbens<sup>c</sup>

Yoshinobu Nakamura<sup>d,e</sup>, Syuji Fujii<sup>d,e\*</sup>

<sup>a</sup> *Division of Applied Chemistry, Graduate School of Engineering, Osaka Institute of Technology, 5-16-1 Omiya, Asahi-ku, Osaka, 535-8585, Japan*

<sup>b</sup> *Department of Chemical Engineering and Materials Science Doshisha University, Kyoto 610-0321, Japan*

<sup>c</sup> *Department of Chemical and Biological Engineering, The University of Sheffield, Mappin Street, Sheffield S1 3JD, UK*

<sup>d</sup> *Department of Applied Chemistry, Faculty of Engineering, Osaka Institute of Technology, 5-16-1 Omiya, Asahi-ku, Osaka, 535-8585, Japan*

<sup>e</sup> *Nanomaterials Microdevices Research Center, Osaka Institute of Technology, 5-16-1 Omiya, Asahi-ku, Osaka, 535-8585, Japan*

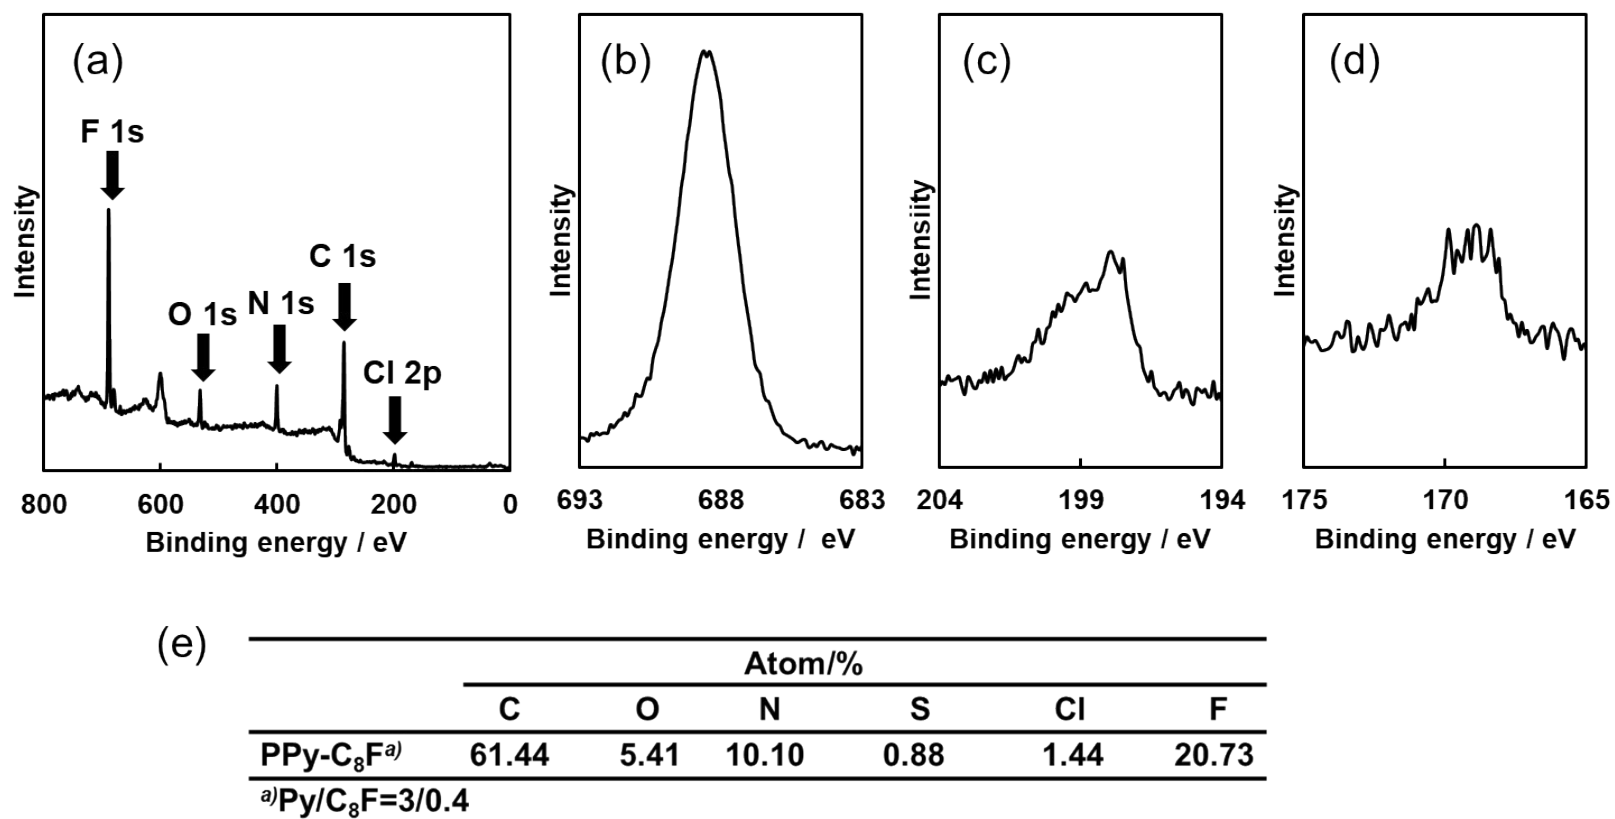

**Figure S1.** X-ray photoelectron spectroscopy (a) survey spectrum, (b) F 1s spectrum, (c) Cl 2p spectrum and (d) S 2p spectrum of PPy-C8F powder. (e) Surface atomic compositions of the PPy-C8F powder.

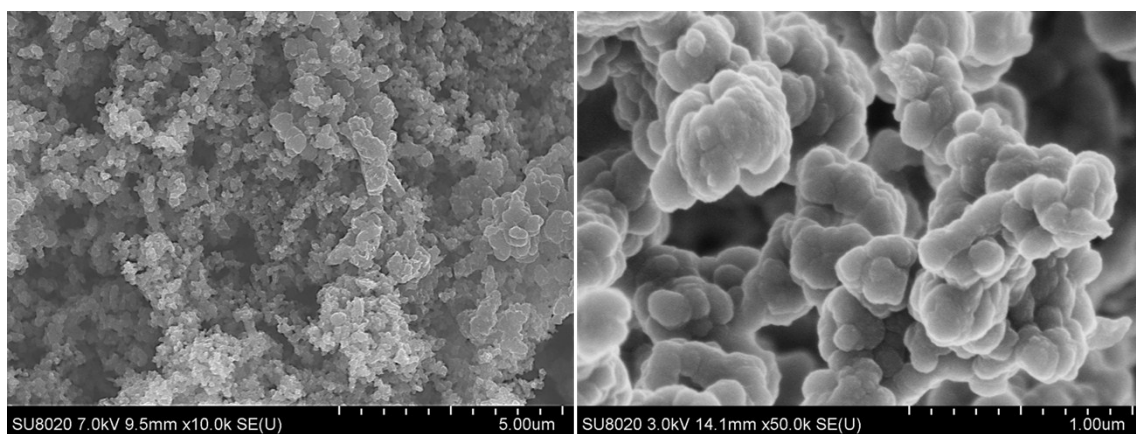

**Figure S2.** SEM images of PPy-C8F powder (Py/C8F=3/0.4).
